# Supplementary material
Source: PubMed Central journal article supplement (PMC6894172)
Supplement: NIHMS1060219-supplement-1.pdf [file NIHMS1060219-supplement-1.pdf]

530 **Supplementary Data Table 1**

| Gene           | 5' primer                 | 3' primer                 |
|----------------|---------------------------|---------------------------|
| 18SrRNA        | CTTAGAGGGACAAGTGGCG       | ACGCTGAGCCAGTCAGTGTA      |
| Aconitase      | CCTGTGTGCTCCGGGAACT       | GCTTATTGATGGTCACGTGTCTCT  |
| ADAM           | TCTGGCTCT-CCATGAATGTC     | CTGCTTGGAACCTTCTGTGA      |
| BAD            | GAAGATGAAGGGATGGAGGA      | AGGAACCCTCAAATTCATCG      |
| Beclin-1       | GGCTGAGAGACTGGATCAGG      | CTGCGTCTGGGCATAACG        |
| COX1           | GTGCTGGGGCAGTGCTGGAG      | TGGGGCCTGAGTAGCCCGTG      |
| LC3-II         | GAGAAGCAGCTTCTGTTCTGG     | GTGTCCGTTACCAACAGGAAG     |
| Nrf2           | TCTCCTCGCTGGAAAAAGAA      | AATGTGCTGGCTGTGCTTTA      |
| p53            | GCCGACCTATCCTTACCATC      | CTTCTTCTGTACGGCGGTCT      |
| p62            | GCTGCCCTATACCCACATCT      | CGCCTTCATCCGAGAAAC        |
| PDK4           | CCGTATTTCTACTCGGATGCTG    | TGGCTTGGGTTTCCTGTC        |
| PGC1 $\alpha$  | TGGAGTGACATCGAGTGTGCT     | GAGTCCACCCAGAAAGCTGT      |
| TFAM           | ATTCCGAAGTGTTTTTCCAGCA    | TCTGAAAGTTTTGCATCTGGGT    |
| $\beta$ -actin | TGGAATCCTGTGGCATCCATGAAAC | TAAAACGCAGCTCAGTAACAGTCCG |

531

532 **Supplementary Data Table 2**

| Antibody name        | Company                      | Catalog No. | Dilution |
|----------------------|------------------------------|-------------|----------|
| Anti-Aconitase       | Proteintech                  | 12406-1-AP  | 1:200    |
| Anti-Drp1            | BD Transduction Laboratories | 611113      | 1:500    |
| Anti-Lamp1           | Santa Cruz Biotechnology     | sc-20011    | 1:250    |
| Anti-Mfn2            | Proteintech                  | 12186-1-AP  | 1:250    |
| Anti-TOM20           | Santa Cruz Biotechnology     | sc-11415    | 1:500    |
| Anti-VDAC1           | Abcam                        | 14734       | 1:500    |
| Anti- $\beta$ -actin | Cell Signaling Technology    | 3700        | 1:500    |

533
